# Supplementary material for: Zinc(ii) complexes containing bis-benzimidazole derivatives as a new class of apoptosis inducers that trigger DNA damage-mediated p53 phosphorylation in cancer cells
Source: Royal Society of Chemistry journal article supplement (doi:10.1039/c3dt33077j), 2013-01-01
Supplement: c3dt33077j.pdf [file c3dt33077j.pdf]

## Supporting Information

For

### Zinc (II) Complexes Containing Bis-benzimidazole Derivatives as a New Class of Apoptosis Inducers That Trigger DNA Damage-mediated P53 Phosphorylation in Cancer Cells

Shenggui Liu <sup>#a, b</sup>, Wenqiang Cao <sup>#a</sup>, Lianling Yu <sup>a</sup>, Wenjie Zheng <sup>\*a</sup>, Linlin Li <sup>a</sup>, Cundong Fan <sup>a</sup>,  
Tianfeng Chen <sup>\*a</sup>

*# Authors contributed equally to the work.*

*a Department of Chemistry, Jinan University, Guangzhou, 510632, P.R. China.*

*b Department of Chemistry Science and Technology, Zhanjiang Normal University, Zhanjiang, 524048, P.R. China.*

## EXPERIMENTAL SECTION

### Synthesis and characterizations

The Schematic routes for the synthesis of ligand and complexes were shown in

#### Scheme S1.

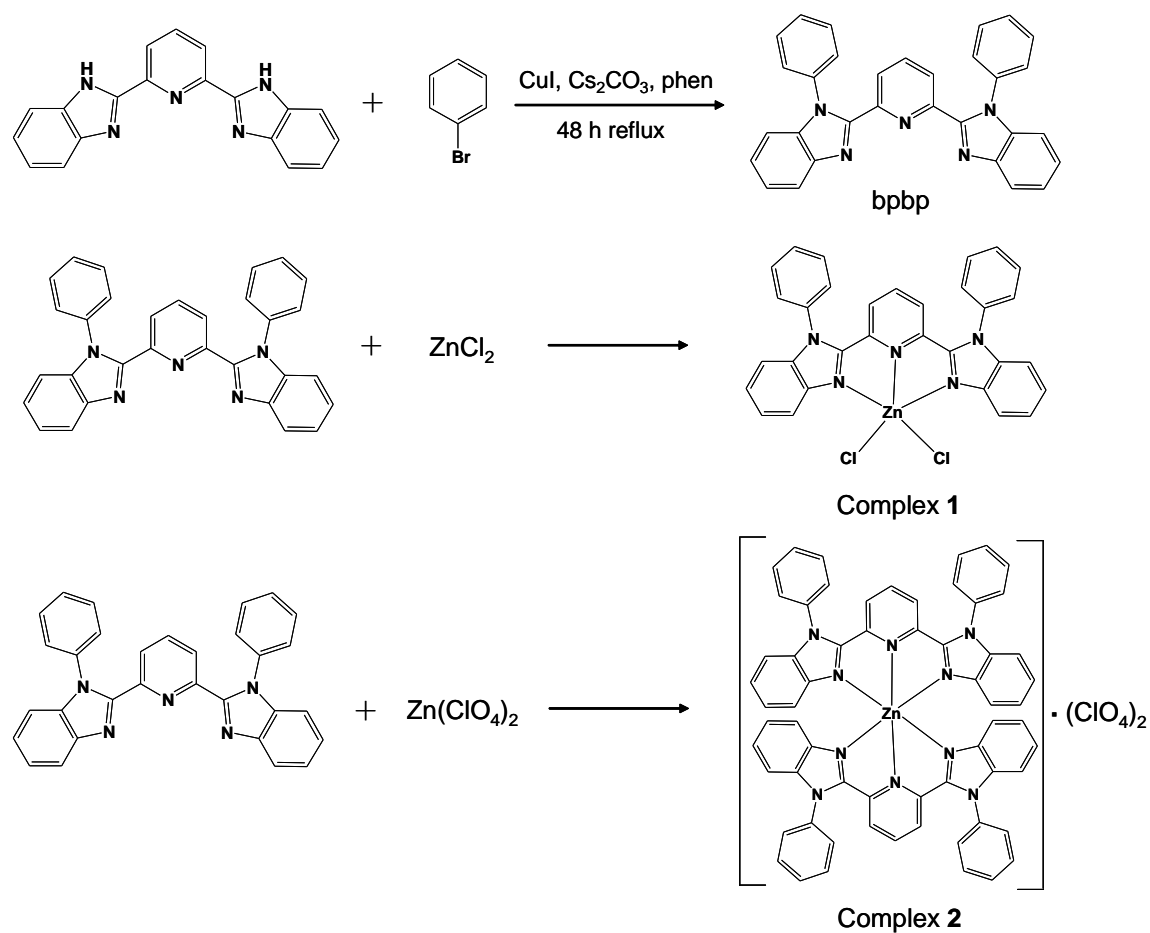

**Scheme S1.** Schematic routes for synthesis of ligand (bpbp), complex 1 and 2.

## RESULTS

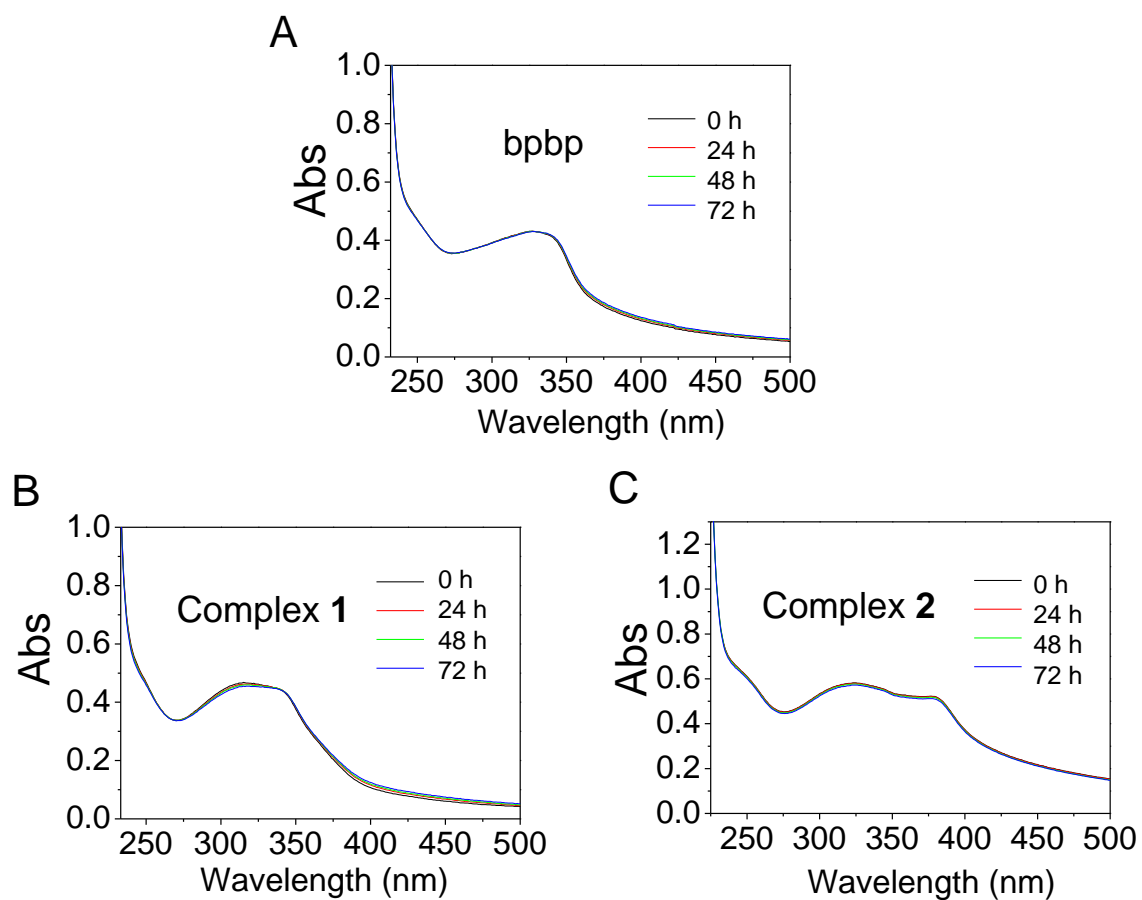

**Figure S1.** UV-Vis absorption spectra of ligand and complexes in DMSO during incubation at 25 °C.

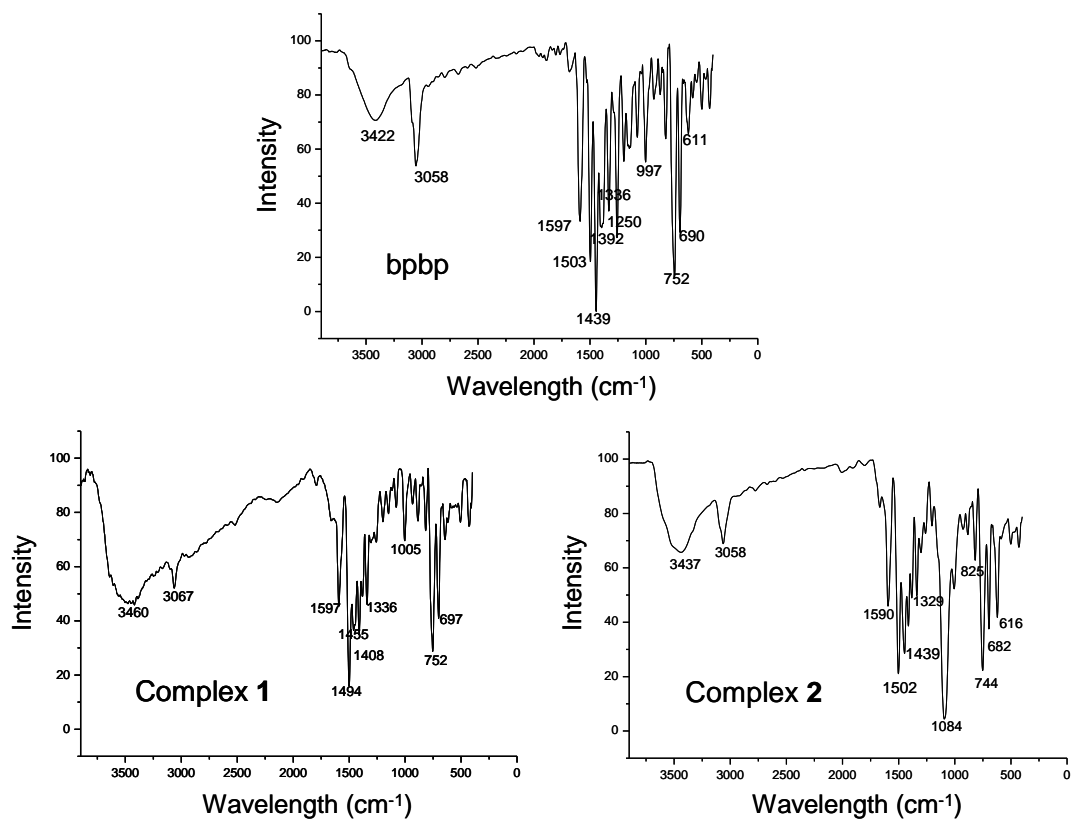

**Figure S2.** The IR spectra of ligand and complexes.

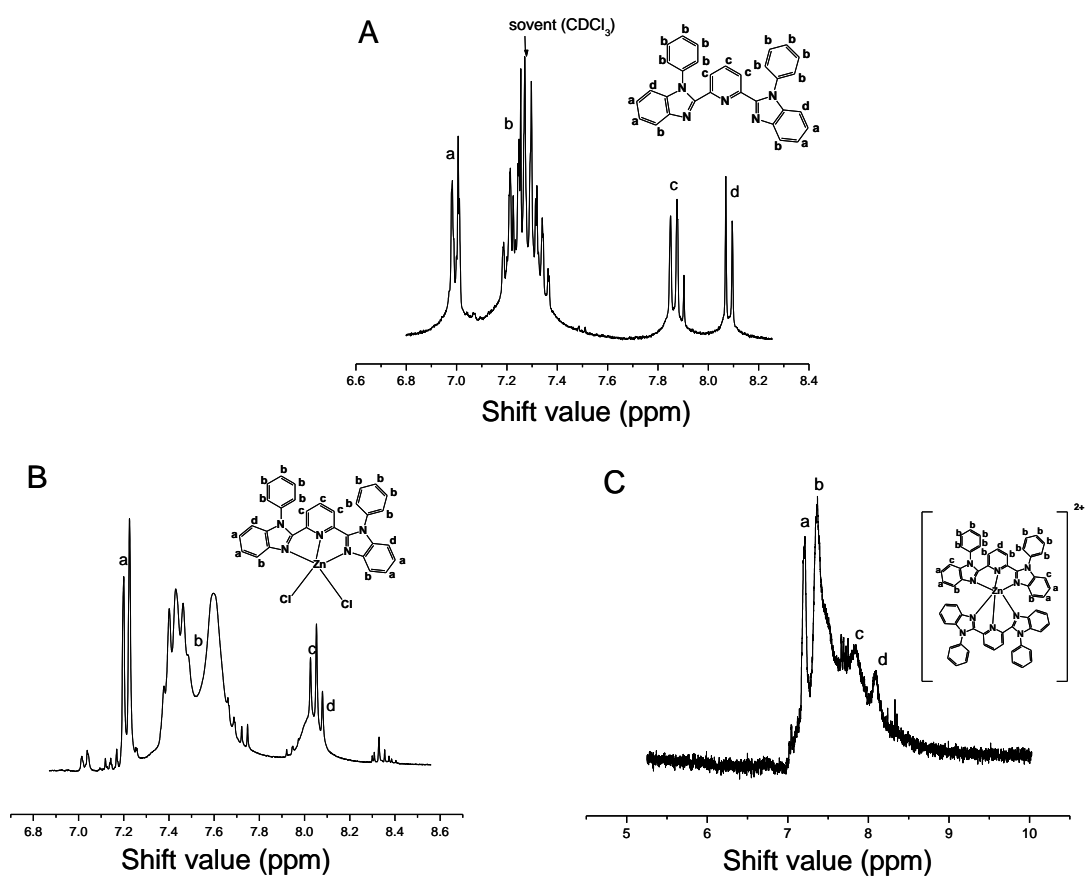

**Figure S3.** The <sup>1</sup>H NMR spectra of bpbp (A), complex 1 (B) and 2 (C).

**Table S1.** Selected crystallographic data for bpbp, complex **1** and complex **2**

|                                                        | bpbp                                           | Complex 1                                                         | Complex 2                                                                       |
|--------------------------------------------------------|------------------------------------------------|-------------------------------------------------------------------|---------------------------------------------------------------------------------|
| Formula                                                | C <sub>31</sub> H <sub>21</sub> N <sub>5</sub> | C <sub>31</sub> H <sub>21</sub> C <sub>12</sub> N <sub>5</sub> Zn | C <sub>64</sub> H <sub>50</sub> Cl <sub>2</sub> N <sub>10</sub> O <sub>10</sub> |
| formula weight                                         | 463.53                                         | 599.80                                                            | 1255.41                                                                         |
| Crystal system                                         | Orthorhombic                                   | Monoclinic                                                        | Triclinic                                                                       |
| space group                                            | Pbcn                                           | Cc                                                                | P-1                                                                             |
| a / Å                                                  | 10.9303(12)                                    | 15.743(2)                                                         | 11.1528(10)                                                                     |
| b / Å                                                  | 11.0153(12)                                    | 9.4359(14)                                                        | 13.9924(12)                                                                     |
| c / Å                                                  | 19.836(2)                                      | 17.663(3)                                                         | 19.1852(17)                                                                     |
| α / °                                                  | 90                                             | 90                                                                | 82.0960(10)                                                                     |
| β / °                                                  | 90                                             | 90.993(2)                                                         | 76.3430(10)                                                                     |
| γ / °                                                  | 90                                             | 90                                                                | 89.2320(10)                                                                     |
| V / Å <sup>3</sup>                                     | 2388.3(4)                                      | 2623.3(7)                                                         | 2881.1(4)                                                                       |
| Z                                                      | 4                                              | 4                                                                 | 2                                                                               |
| Density calc.Mg.m <sup>-3</sup>                        | 1.289                                          | 1.519                                                             | 1.447                                                                           |
| Absorption coefficient (mm <sup>-1</sup> )             | 0.078                                          | 1.172                                                             | 0.590                                                                           |
| F(000)                                                 | 968                                            | 1224                                                              | 1296                                                                            |
| Crystal size                                           | 0.45, 0.41, 0.23                               | 0.44, 0.34, 0.13                                                  | 0.36, 0.25, 0.18                                                                |
| Theta range for data collection                        | 2.05 to 27.05                                  | 2.31 to 27.02                                                     | 1.10 to 27.11                                                                   |
|                                                        | -13<=h<=13                                     | -20<=h<=12                                                        | -14<=h<=14                                                                      |
| Limiting indices                                       | -7<=k<=14                                      | -12<=k<=11                                                        | -17<=k<=17                                                                      |
|                                                        | -25<=l<=23                                     | -21<=l<=22                                                        | -24<=l<=24                                                                      |
| Reflections collected / unique                         | 13313 / 2618                                   | 7229/3936                                                         | 24439/12375                                                                     |
|                                                        | [R(int) = 0.0234]                              | [R(int) = 0.0233]                                                 | [R(int)= 0.0283]                                                                |
| Data / restraints / parameters                         | 2618 / 0 / 164                                 | 3936 / 2 / 353                                                    | 12375 / 22 / 811                                                                |
| GOF on F <sup>2</sup>                                  | 1.032                                          | 1.095                                                             | 1.056                                                                           |
| Max. and min. transmission                             | 0.9822 , 0.9656                                | 0.8626 , 0.6267                                                   | 0.838, 0.899                                                                    |
| Final R indices[I>2sigma(I)]                           | R1 = 0.0352,<br>wR2= 0.0830                    | R1= 0.0287,<br>wR2 = 0.0631                                       | R1 = 0.0680,<br>wR2 = 0.1772                                                    |
| R indices (all, data) R <sub>1</sub> , wR <sub>2</sub> | R1 = 0.0498,<br>wR2 = 0.0929                   | R1= 0.0351,<br>wR2= 0.0663                                        | R1 = 0.0759<br>wR2 =0.2068                                                      |
| Largest diff. peak and hole e.Å <sup>-3</sup>          | 0.215 , -0.204                                 | 0.275,-0.293                                                      | 1.928, -1.974                                                                   |

**Table S2.** Selected bond lengths (Å) and angles (°) for bpbp

| <b>Bond lengths</b>     |            | <b>Bond angles</b> |            |
|-------------------------|------------|--------------------|------------|
| N(1)-C(3) <sup>#1</sup> | 1.3393(14) | N(1)               | 1.3393(14) |
| C(4)-N(3)               | 1.3144(15) | C(4)               | 1.3794(15) |
| N(3)-C(5)               | 1.3890(16) | C(10)              | 1.3857(14) |
| N(2)-C(11)              | 1.4364(15) | --                 | --         |
| N(3)-C(4)-N(2)          | 113.67(10) | N(2)               | 105.30(10) |
| N(2)-C(4)-C(3)          | 121.72(10) | C(4)               | 106.05(9)  |
| C(4)-N(2)-C(11)         | 127.19(10) | C(10)              | 126.67(10) |
| C(12)-C(11)-N(2)        | 119.51(11) | C(16)              | 119.33(11) |

Symmetry transformations used to generate equivalent atoms: #1 -x+1, y, -z+1/2

**Table S3.** Selected bond lengths (Å) and angles (°) for complex **1**

| <b>Bond lengths</b> |            | <b>Bond angles</b> |            |
|---------------------|------------|--------------------|------------|
| Zn(1)-N(4)          | 2.133(3)   | Zn(1)-N(1)         | 2.139(3)   |
| Zn(1)-N(3)          | 2.237(3)   | Zn(1)-Cl(1)        | 2.2558(10) |
| Zn(1)-Cl(2)         | 2.2731(10) | --                 | --         |
| N(4)-Zn(1)-N(1)     | 144.52(10) | N(1)-Zn(1)-N(3)    | 72.10(9)   |
| N(4)-Zn(1)-N(3)     | 72.44(9)   | N(4)-Zn(1)-Cl(1)   | 97.27(8)   |
| N(1)-Zn(1)-Cl(1)    | 98.35(8)   | N(3)-Zn(1)-Cl(1)   | 118.73(8)  |
| N(4)-Zn(1)-Cl(2)    | 100.17(8)  | N(1)-Zn(1)-Cl(2)   | 99.98(8)   |
| N(3)-Zn(1)-Cl(2)    | 122.79(8)  | Cl(1)-Zn(1)-Cl(2)  | 118.48(4)  |



**Table S4.** Selected bond lengths (Å) and angles (°) for complex **2**

| <b>Bond lengths</b> |            | <b>Bond angles</b> |            |
|---------------------|------------|--------------------|------------|
| Zn(1)-N(3)          | 2.117(3)   | Zn(1)-N(6)         | 2.140(3)   |
| Zn(1)-N(8)          | 2.142(3)   | Zn(1)-N(1)         | 2.143(3)   |
| Zn(1)-N(4)          | 2.168(3)   | Zn(1)-N(9)         | 2.191(3)   |
| N(3)-Zn(1)-N(6)     | 111.78(12) | --                 | --         |
| N(6)-Zn(1)-N(8)     | 75.23(12)  | N(3)-Zn(1)-N(1)    | 76.01(12)  |
| N(6)-Zn(1)-N(1)     | 89.60(12)  | N(8)-Zn(1)-N(1)    | 109.81(12) |
| N(3)-Zn(1)-N(4)     | 75.46(12)  | N(3)-Zn(1)-N(8)    | 171.33(12) |
| N(8)-Zn(1)-N(4)     | 98.32(12)  | N(6)-Zn(1)-N(4)    | 102.75(12) |
| N(3)-Zn(1)-N(9)     | 98.79(12)  | N(1)-Zn(1)-N(4)    | 151.41(13) |
| N(8)-Zn(1)-N(9)     | 74.69(12)  | N(6)-Zn(1)-N(9)    | 149.21(13) |
| N(4)-Zn(1)-N(9)     | 87.99(12)  | N(1)-Zn(1)-N(9)    | 94.42(12)  |
